# Supplementary material for: Fabrication of supported Pt/CeO2 nanocatalysts doped with different elements for CO oxidation: theoretical and experimental studies
Source: Royal Society of Chemistry journal article supplement (doi:10.1039/d3dt00181d), 2023-01-01
Supplement: d3dt00181d1.pdf [file d3dt00181d1.pdf]

## ***Electronic Supplementary Information (ESI)***

---

### **Fabrication of supported Pt/CeO<sub>2</sub> nanocatalysts doped with different elements for CO oxidation: Theoretical and experimental studies**

*Xingwen Cha,<sup>a</sup> Xueying Wang,<sup>a</sup> Mingzhen Huang,<sup>a</sup> Dongren Cai,<sup>a</sup> Kang Sun,<sup>b</sup> Jianchun Jiang,<sup>b</sup> Shu-feng Zhou,<sup>a,\*</sup> and Guowu Zhan<sup>a,\*</sup>*

*<sup>a</sup> College of Chemical Engineering, Integrated Nanocatalysts Institute (INCI), Huaqiao University, 668 Jimei Avenue, Xiamen, Fujian, 361021, P. R. China*

*<sup>b</sup> Institute of Chemical Industry of Forest Products, Chinese Academy of Forestry (CAF), 16 Suojin Five Village, Nanjing, Jiangsu, 210042, P. R. China*

\*E-mail: gwzhan@hqu.edu.cn (G. Zhan); szhou@hqu.edu.cn (S-F. Zhou)

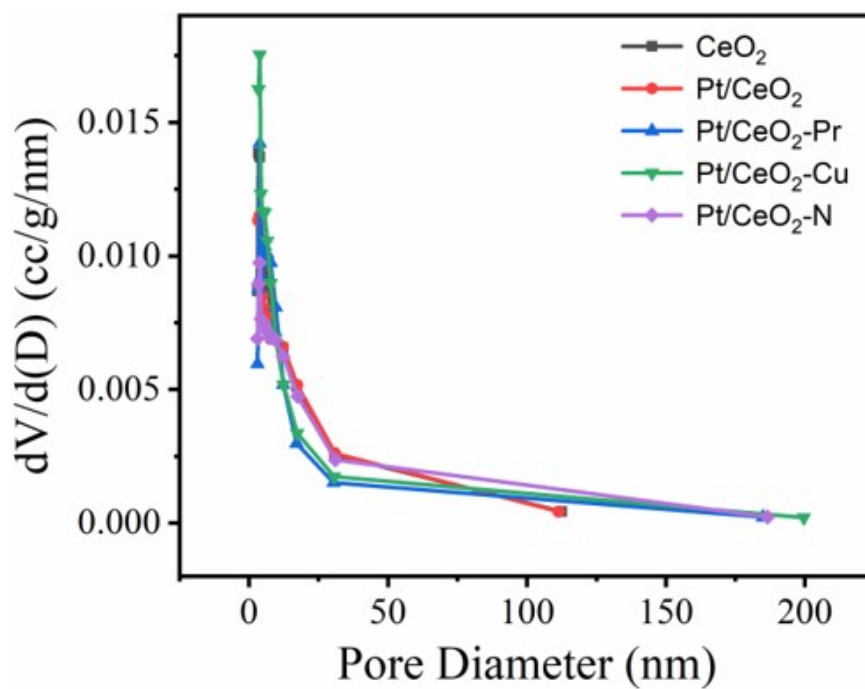

**Figure S1.** Pore size distribution plots of CeO<sub>2</sub>, Pt/CeO<sub>2</sub>, and Pt/CeO<sub>2</sub>-M (M = Pr, Cu, N).

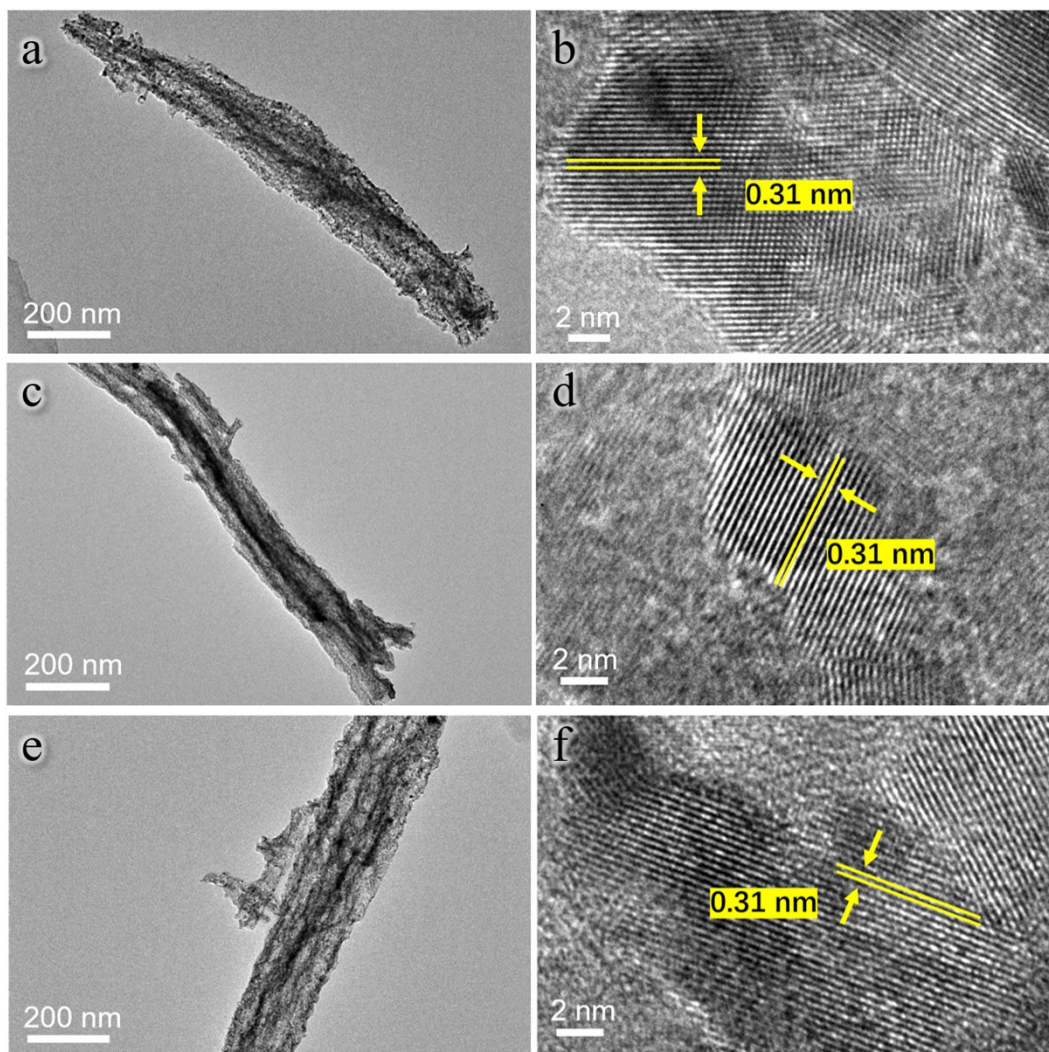

**Figure S2.** TEM and high-resolutionTEM images of (a, b) Pt/CeO<sub>2</sub>, (c, d) Pt/CeO<sub>2</sub>-Pr, and (e, f) Pt/CeO<sub>2</sub>-N samples.

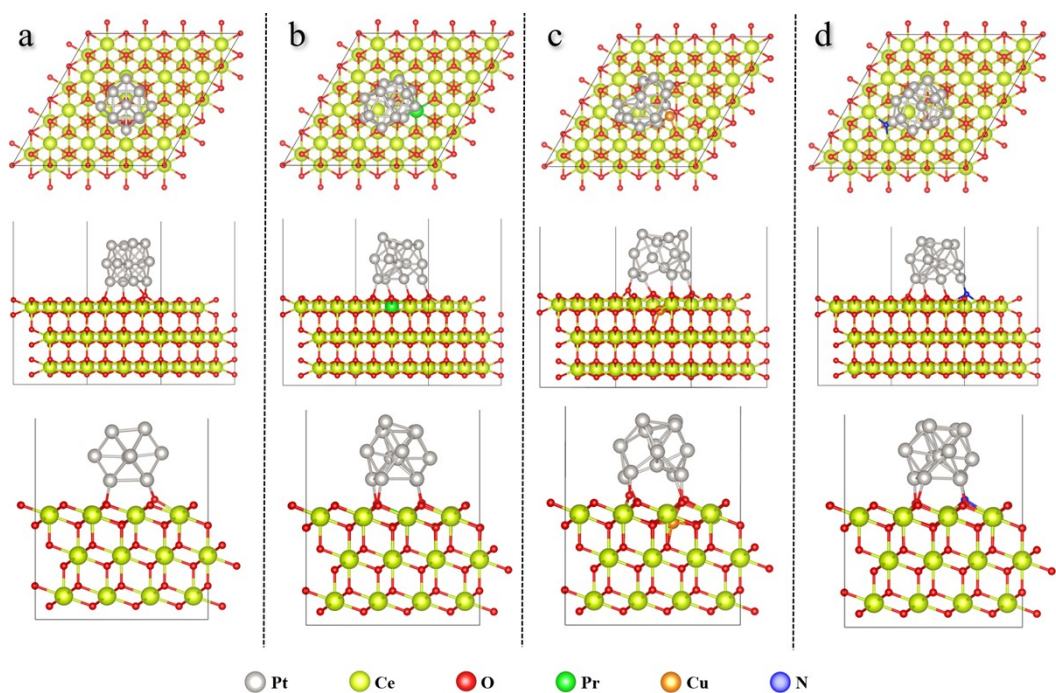

**Figure S3.** The optimized models of the four catalysts (a)  $\text{Pt}_{13}/\text{CeO}_2$ , (b)  $\text{Pt}_{13}/\text{CeO}_2\text{-Pr}$ , (c)  $\text{Pt}_{13}/\text{CeO}_2\text{-Cu}$ , and (d)  $\text{Pt}_{13}/\text{CeO}_2\text{-N}$ .

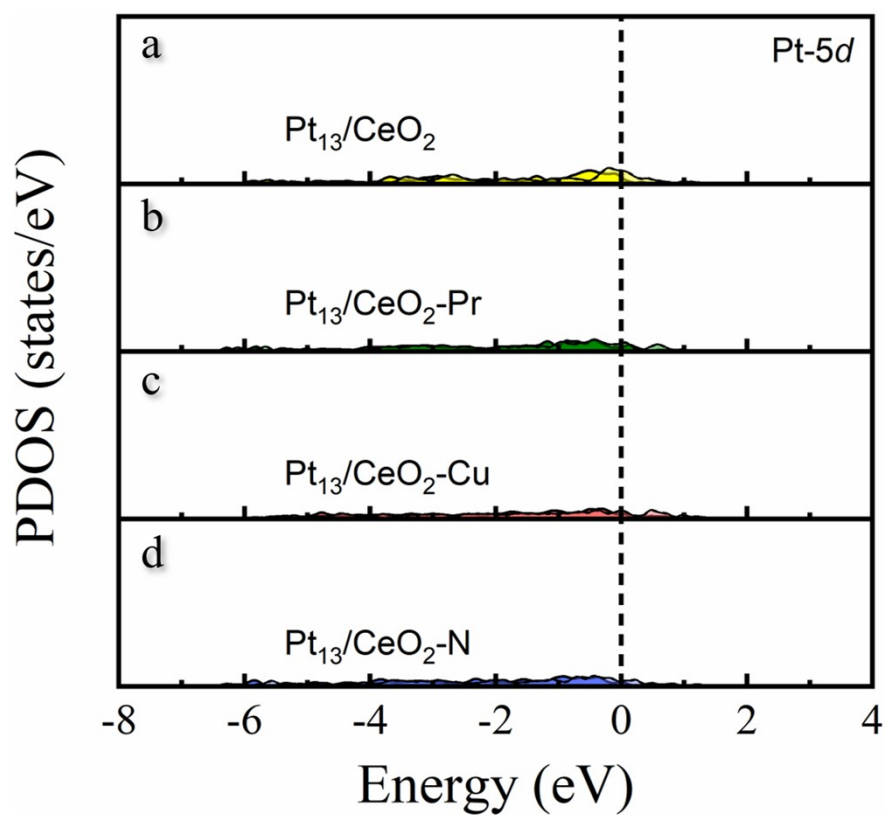

**Figure S4.** PDOS of Pt-5d state of (a)  $\text{Pt}_{13}/\text{CeO}_2$ , (b)  $\text{Pt}_{13}/\text{CeO}_2\text{-Pr}$ , (c)  $\text{Pt}_{13}/\text{CeO}_2\text{-Cu}$ , and (d)  $\text{Pt}_{13}/\text{CeO}_2\text{-N}$ .

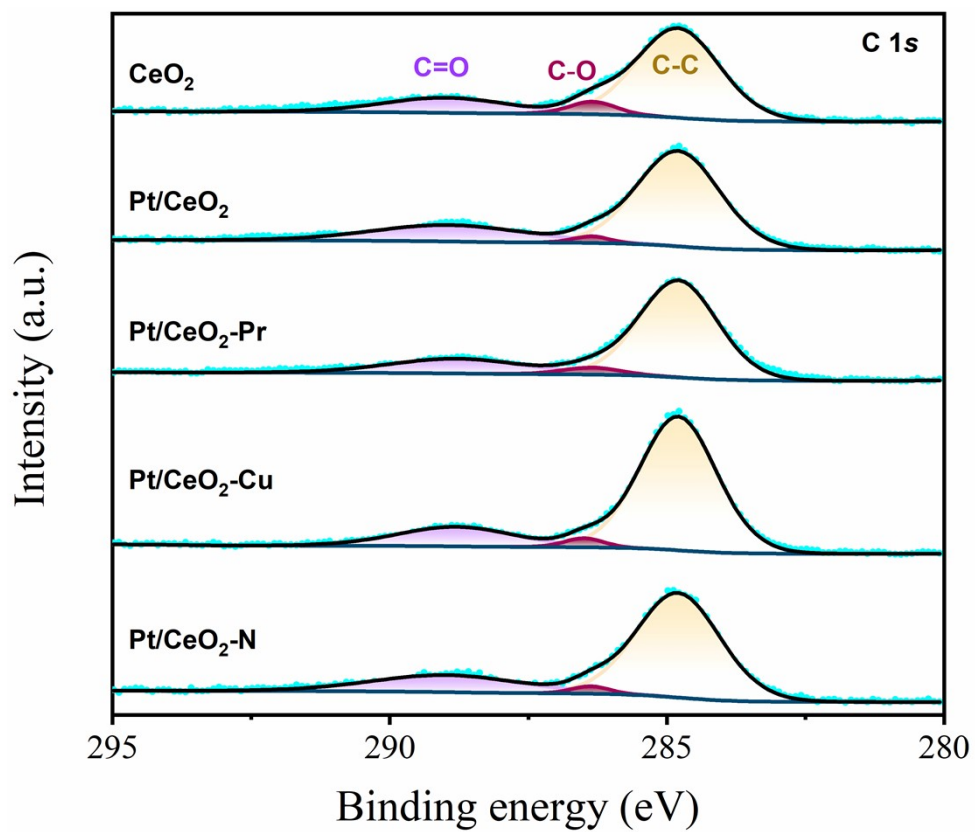

**Figure S5.** High-resolution XPS spectra of C 1s over five different catalysts.

**Table S1.** The activation energies ( $E_a$ ) of different catalysts reported in the literature.

| Catalyst                       | Activation energies ( $E_a$ )<br>(kJ/mol) | Reference |
|--------------------------------|-------------------------------------------|-----------|
| CeO <sub>2</sub>               | 64                                        | [1]       |
| FePc/CeO <sub>2</sub>          | 50                                        | [1]       |
| Au/CeO <sub>2</sub>            | 42                                        | [1]       |
| hemin/CeO <sub>2</sub>         | 61                                        | [1]       |
| hemin-Au/CeO <sub>2</sub>      | 21                                        | [1]       |
| FePc-Au/CeO <sub>2</sub>       | 34                                        | [1]       |
| Pt/bio-CeO <sub>2</sub>        | 45                                        | [2]       |
| Pd/bio-CeO <sub>2</sub>        | 47                                        | [2]       |
| Au/bio-CeO <sub>2</sub>        | 37                                        | [2]       |
| Ag/bio-CeO <sub>2</sub>        | 49                                        | [2]       |
| Pt/CeO <sub>2</sub> 500C       | 55                                        | [3]       |
| Pt/CeO <sub>2</sub> 800C       | 79                                        | [3]       |
| Pt/(800C)CeO <sub>2</sub> 500C | 33                                        | [3]       |
| Pt/(800C)CeO <sub>2</sub> 800C | 56                                        | [3]       |

### References

1. L. Fan, J. Dai, Z. Huang, J. Xiao, Q. Li, J. Huang, S.-F. Zhou and G. Zhan, *iScience*, 2020, **23**, 101852.
2. B. Jiang, X. Cha, Z. Huang, S. Hu, K. Xu, D. Cai, J. Xiao and G. Zhan, *Molecular Catalysis*, 2022, **524**, 112251.
3. J. Lee, Y. Ryou, J. Kim, X. Chan, T. J. Kim and D. H. Kim, *The Journal of Physical Chemistry C*, 2018, **122**, 4972-4983.
